# Supplementary material for: Environmental DNA as a ‘Snapshot’ of Fish Distribution: A Case Study of Japanese Jack Mackerel in Maizuru Bay, Sea of Japan
Source: PLoS One. 2016 Mar 2;11(3):e0149786. doi: 10.1371/journal.pone.0149786 (PMC4775019; doi:10.1371/journal.pone.0149786)
Supplement: S1 Table — (XLSX) [file pone.0149786.s003.xlsx]

## Sheet: S1_Table
S1 Table. Average copy number of jack mackerel eDNA in a 2 µL template DNA solution and local echo intensity at each sampling station.
			Distance from the market (km)		eDNA concentration												Echo intensity
				Depth (m)	Surface						Bottom						20m buffer (10m radius)								60m buffer (30m radius)								buffer 100m (50m radius)								300m buffer (150m radius)								500m buffer (250m radius)
	Coordinate				Filter 1		Filter 2		Filter 3		Filter 1		Filter 2		Filter 3			surface			bottom					surface			bottom					surface			bottom					surface			bottom
Station ID	Lat.	Lon.			mean	s.d.1	mean	s.d.1	mean	s.d.1	mean	s.d.1	mean	s.d.1	mean	s.d.1	Entire column	2m	5m	10m	2m	5m	10m	Water area	Entire column	2m	5m	10m	2m	5m	10m	Water area	Entire column	2m	5m	10m	2m	5m	10m	Water area	Entire column	2m	5m	10m	2m	5m	10m	Water area	Entire column
1	35.4586	135.319	0.6	10	79.0114	14.8088	20.7978	3.84869	17.063	4.55404	7.79497	2.80685	3.15227	1.52212	2.31784	1.77791	8.45626e-08	0	0	8.45626e-08	8.45626e-08	8.45626e-08	8.45626e-08	1250	2.25383e-07	0	2.44471e-08	1.65149e-07	1.37345e-07	1.40702e-07	1.65149e-07	11285	4.51553e-07	5.90936e-08	4.63986e-07	6.82994e-07	2.1817e-07	2.19007e-07	6.82994e-07	31375	9.0776e-07	4.41508e-08	5.83794e-07	8.32055e-07	1.82712e-07	2.48883e-07	8.32678e-07	258099	1.36467e-06
2	35.4585	135.323	0.256	7.3	294.84	41.1445	158.131	10.7451	41.5634	5.6901	431.237	48.2003	147.169	13.8424	64.8739	15.2099	0	0	0	0	0	0	0	1250	1.9839e-06	0	3.48856e-08	3.78428e-08	2.9572e-09	3.78428e-08	3.78428e-08	11285	1.66392e-06	0	2.30304e-08	5.08744e-08	2.77475e-08	5.08744e-08	5.08744e-08	31375	1.82375e-06	2.31258e-08	3.43703e-07	4.37676e-07	5.87679e-08	1.36338e-07	4.38002e-07	231894	2.35031e-06
3	35.4629	135.323	0.677	9.5	76.2939	15.19	26.8604	5.91324	19.7486	5.9562	19.9154	1.42987	6.61701	0.546635	3.84361	0.632691	5.33952e-07	0	4.81141e-07	5.33952e-07	4.38153e-09	5.28108e-08	5.33952e-07	1250	9.26898e-06	0	3.38405e-07	4.12521e-07	6.76088e-09	7.41153e-08	4.12521e-07	11285	8.39937e-06	0	4.81046e-07	5.26158e-07	4.37056e-09	4.51113e-08	5.26158e-07	31375	4.87744e-06	2.68604e-08	2.40511e-06	5.73923e-06	5.25417e-06	5.45447e-06	5.7531e-06	282618	3.07041e-06
4	35.4629	135.319	0.858	12	42.6326	13.8072	15.2058	5.77463	11.0511	5.25193	14.2246	10.0243	8.96396	0.669262	3.51367	2.36413	3.84661e-06	0	0	8.74899e-07	3.424e-06	3.84661e-06	3.84661e-06	1250	2.03918e-06	0	0	7.25373e-07	2.47628e-06	2.79907e-06	2.79907e-06	11285	1.45757e-06	0	4.7676e-08	8.92728e-07	2.12332e-06	2.57364e-06	2.62132e-06	31375	1.36548e-06	0	3.04076e-07	6.93144e-07	8.27826e-07	1.08444e-06	1.3959e-06	235429	2.50493e-06
5	35.4667	135.321	1.134	12.3	12.908	2.58698	3.17976	2.44697	8.75972	0.719593	4.60399	1.41532	3.0722	2.08958	1.35553	0.409324	4.72851e-07	0	0	1.59351e-08	4.56916e-07	4.72851e-07	4.72851e-07	1250	5.45953e-07	0	0	7.48346e-09	1.94297e-07	2.01782e-07	2.01782e-07	11285	8.34321e-07	0	2.71927e-09	1.69917e-07	1.54334e-07	1.58447e-07	3.24163e-07	31375	1.04705e-06	2.19032e-08	5.01562e-08	1.6487e-07	2.18471e-07	2.73888e-07	3.76204e-07	279644	1.55651e-06
6	35.4671	135.325	1.116	9	13.843	5.20178	2.31304	2.04577	3.90835	2.40349	8.26111	7.58755	2.05475	1.78781	1.42462	0.582942	5.03064e-09	0	0	5.03064e-09	5.03064e-09	5.03064e-09	5.03064e-09	1250	2.69827e-06	0	2.18276e-08	6.06594e-08	1.79932e-09	6.06594e-08	6.06594e-08	11285	2.15509e-06	0	2.5708e-08	5.6337e-08	5.83107e-09	4.24655e-08	5.6337e-08	31375	2.20662e-06	3.50796e-08	7.11132e-08	1.6209e-07	2.46971e-08	8.10396e-08	1.74826e-07	280522	1.49102e-06
7	35.4669	135.329	1.13	7	47.7693	7.53012	26.0891	1.56571	13.4863	7.58654	9.16641	4.95133	3.17425	1.68523	1.10677	0.0651979	0	0	0	0	0	0	0	1250	1.25512e-06	0	0	0	0	0	0	11285	1.06662e-06	2.99317e-08	6.42438e-08	8.22457e-08	1.8002e-08	8.22457e-08	8.22457e-08	31375	1.86867e-06	2.32055e-07	2.57484e-07	2.77458e-07	1.95173e-08	4.77165e-08	2.77458e-07	195614	2.77213e-06
8	35.4705	135.329	1.528	10	18.6493	7.78317	6.65842	3.68258	5.01027	3.59157	16.18	5.44295	8.77794	0.459123	0.119848	-	0	0	0	0	0	0	0	1250	5.75126e-07	0	0	5.76704e-08	0	5.76704e-08	5.76704e-08	11285	6.26834e-07	0	2.26752e-09	3.95193e-08	5.27516e-09	3.72507e-08	3.95193e-08	29854	8.26518e-07	2.39991e-07	3.09137e-07	3.78822e-07	4.34995e-08	6.79159e-08	3.79357e-07	233080	1.16245e-06
9	35.4709	135.325	1.551	11	17.8725	5.8865	6.45841	1.79284	3.96548	1.33041	10.1077	2.61788	4.71849	3.73676	2.20899	2.04991	2.40722e-07	0	0	1.71562e-07	9.86578e-08	2.21648e-07	2.40722e-07	1250	9.11691e-07	0	5.34752e-08	1.90076e-07	4.08281e-07	4.70161e-07	5.29376e-07	11285	1.90883e-06	8.02885e-07	1.79197e-06	1.90269e-06	3.89939e-07	4.23309e-07	1.43688e-06	31375	1.52672e-06	3.18896e-07	1.58442e-06	1.96994e-06	4.65352e-07	7.8493e-07	2.1176e-06	282618	1.98825e-06
10	35.4708	135.321	1.602	11	21.1222	5.16938	8.71859	2.54223	5.13021	3.71366	0	-	2.81668	0.132564	1.74572	2.42068	1.0865e-08	0	0	2.04822e-09	1.0865e-08	1.0865e-08	1.0865e-08	1250	9.69812e-07	0	1.14363e-09	3.93949e-06	6.98543e-07	3.95336e-06	3.9545e-06	11285	7.44548e-07	0	7.42848e-07	2.58499e-06	3.85046e-07	1.89775e-06	2.6406e-06	31375	1.77971e-06	2.75982e-07	1.83834e-06	3.0918e-06	7.42508e-07	1.63661e-06	3.44938e-06	251321	1.9223e-06
11	35.475	135.323	2.047	12	38.8454	11.3512	20.9315	5.26979	13.8079	1.03782	4.5922	6.46087	0	-	0	-	9.19917e-07	0	0	0	9.19917e-07	9.19917e-07	9.19917e-07	1250	1.35133e-06	0	1.19042e-07	1.73695e-07	8.5017e-07	8.50436e-07	1.01667e-06	11285	1.03796e-06	0	9.9967e-08	1.40627e-07	7.586e-07	7.58763e-07	8.89572e-07	31375	1.26215e-06	3.80063e-07	1.59121e-06	3.10381e-06	6.78154e-07	1.98226e-06	3.56376e-06	228797	1.07445e-06
12	35.4751	135.325	2.034	12	31.4675	13.363	11.6092	5.52479	10.5203	1.68092	26.3335	6.44465	3.88831	3.43769	3.3081	1.95604	5.00919e-06	0	3.34168e-07	1.20799e-06	3.91688e-06	4.39346e-06	5.00919e-06	1250	1.44442e-06	6.72869e-07	1.28203e-06	1.58741e-06	1.33814e-06	1.50089e-06	2.19637e-06	11285	1.19123e-06	3.79738e-07	7.55708e-07	9.67083e-07	8.12537e-07	9.39089e-07	1.36739e-06	31375	2.28206e-06	4.00672e-07	1.26129e-06	1.40839e-06	5.09213e-07	5.96637e-07	1.6141e-06	282059	2.59463e-06
13	35.4753	135.329	2.086	14	19.3739	9.21661	7.29972	3.34697	8.82827	6.14317	4.16272	4.74902	0.723597	-	2.81246	2.09901	3.08867e-07	0	2.3747e-07	2.9117e-07	1.76972e-08	2.37914e-08	9.48651e-08	1250	9.84328e-06	0	1.06631e-07	2.45123e-07	3.25139e-07	3.85828e-07	4.68845e-07	11285	1.15825e-05	0	6.61122e-08	2.12192e-07	1.84935e-07	2.22458e-07	3.43392e-07	31375	5.67797e-06	1.47426e-07	1.03141e-06	1.17905e-06	7.19717e-08	1.72575e-07	6.70819e-07	279296	3.20302e-06
14	35.4744	135.332	2.029	11.5	29.9536	10.4514	9.74817	0.649661	14.6493	3.85418	0	-	2.42031	1.68251	1.40015	-	1.47372e-06	1.05135e-07	1.32626e-06	1.38596e-06	1.41522e-07	1.47463e-07	1.47372e-06	1250	2.01079e-06	3.55708e-08	4.48734e-07	5.34603e-07	5.84226e-08	1.16316e-07	5.65049e-07	8289	2.29538e-06	2.34208e-08	2.00322e-06	2.10667e-06	3.89305e-08	1.23967e-07	1.54152e-06	20171	3.08341e-06	3.38527e-08	1.05393e-06	1.19386e-06	8.94463e-08	1.74946e-07	7.72215e-07	182880	3.63342e-06
15	35.4752	135.337	2.291	10.5	13.4223	7.90496	3.60674	1.76208	5.74298	0.468674	1.68986	-	1.90099	-	2.17998	-	1.58847e-08	0	0	1.58847e-08	1.58847e-08	1.58847e-08	1.58847e-08	1250	3.58634e-06	0	1.99435e-07	1.89916e-06	1.68739e-06	1.68816e-06	1.89916e-06	11285	3.71459e-06	0	1.19161e-07	1.09896e-06	9.68326e-07	9.73312e-07	1.09896e-06	31375	3.06399e-06	0	3.36278e-07	7.24713e-07	3.43421e-07	3.87801e-07	7.26206e-07	263842	2.58608e-06
16	35.475	135.342	2.472	8.5	45.1347	10.826	18.2032	3.30908	10.098	2.05782	27.6745	14.3479	7.76637	2.71963	4.58484	0.684003	0	0	0	0	0	0	0	1250	9.28608e-07	0	1.87619e-05	1.87619e-05	0	9.21218e-07	1.87619e-05	11285	8.07154e-07	0	1.2299e-05	1.2299e-05	0	6.19732e-07	1.2299e-05	31375	1.16361e-06	4.42407e-08	4.97494e-06	5.21828e-06	1.63689e-07	4.77939e-07	5.21841e-06	218420	2.28151e-06
17	35.4792	135.341	2.864	11	6.14947	2.28754	2.79886	2.18624	2.70439	1.61653	10.6063	2.02005	0	-	0	-	1.08306e-07	0	0	1.08306e-07	0	1.08306e-07	1.08306e-07	1250	3.48767e-06	9.41252e-07	2.5662e-06	2.81009e-06	9.69287e-10	2.44765e-07	2.81097e-06	11285	7.21663e-06	9.46414e-07	2.21429e-06	2.3478e-06	1.08661e-08	1.38514e-07	2.3528e-06	31375	4.09035e-06	4.81245e-07	1.93426e-06	2.26632e-06	2.30141e-07	3.45494e-07	1.85636e-06	259313	2.71004e-06
18	35.4795	135.337	2.739	13.5	7.78875	4.57689	3.12491	2.96588	4.347	0.909869	9.57433	3.96541	3.46134	1.71793	2.53638	2.25002	1.98718e-07	4.55038e-08	1.07545e-07	1.07545e-07	8.83619e-08	9.11733e-08	9.11733e-08	1250	1.10575e-06	1.1183e-08	4.84885e-08	1.77115e-07	1.06167e-07	1.80541e-07	2.60044e-07	11285	1.25176e-06	6.10848e-09	7.20277e-08	1.85416e-07	7.46219e-08	1.27286e-07	2.47344e-07	31375	3.09961e-06	3.32128e-07	1.70042e-06	1.82221e-06	1.08796e-07	1.50595e-07	1.18756e-06	282618	3.40369e-06
19	35.4792	135.333	2.595	13.5	9.74862	2.6996	4.16239	3.3082	4.52456	1.71982	10.6532	5.46426	4.1564	0.260291	1.74649	1.13982	5.12934e-07	0	5.12934e-07	5.12934e-07	0	0	0	1250	1.20136e-06	0	2.01537e-07	2.61675e-07	1.25766e-09	2.05294e-08	6.22076e-08	11285	1.92799e-06	4.36563e-08	3.42573e-07	4.30055e-07	2.20392e-09	5.17231e-08	2.84092e-07	31375	2.46658e-06	3.58903e-07	6.19996e-07	7.76175e-07	6.10256e-08	1.17623e-07	3.21235e-07	282618	2.21294e-06
20	35.4793	135.329	2.529	13.5	18.8515	3.76679	7.66658	1.54866	8.04528	3.44716	9.10561	2.11159	5.58825	2.78566	1.81281	1.31733	3.97967e-08	0	4.91332e-09	3.86717e-08	1.12389e-09	2.49515e-08	3.97967e-08	1250	8.40459e-07	0	5.33404e-08	1.40163e-07	4.58218e-08	9.75789e-08	1.85986e-07	11285	7.93036e-07	3.7709e-08	1.12644e-07	3.00433e-07	6.72536e-07	1.45187e-06	1.61833e-06	31375	2.14624e-06	6.94244e-07	9.60269e-07	1.1099e-06	2.11583e-07	4.10854e-07	5.74081e-07	282619	2.17171e-06
21	35.4791	135.325	2.49	13	19.1432	10.4815	6.31115	5.48923	3.14037	1.68699	17.5997	6.57737	0.976791	0.494666	0.112504	-	8.16483e-06	0	0	0	8.12802e-06	8.16483e-06	8.16483e-06	1250	1.78238e-06	0	8.4545e-08	9.65076e-08	1.49667e-06	1.50511e-06	1.59964e-06	11285	1.84511e-06	1.21923e-06	1.13898e-06	1.15293e-06	1.01708e-06	1.02268e-06	1.15156e-06	31375	1.96814e-06	7.32717e-07	9.71997e-07	1.06485e-06	5.7192e-07	8.18588e-07	9.31842e-07	274499	2.17974e-06
22	35.4829	135.327	2.929	13.5	7.21922	3.85075	2.69283	0.9543	3.23332	-	9.10935	5.96099	1.23328	-	0.720101	0.54282	6.58095e-08	0	3.44864e-08	3.44864e-08	3.1322e-08	3.1322e-08	4.36289e-08	1250	1.1584e-06	1.53325e-06	2.53853e-06	2.54131e-06	1.25799e-08	2.38791e-08	2.86817e-08	11285	1.5825e-06	1.04631e-06	1.63649e-06	1.68159e-06	1.50357e-06	1.53111e-06	1.56273e-06	31375	2.56665e-06	1.91135e-06	3.83549e-06	3.8936e-06	4.8681e-07	5.1197e-07	5.98404e-07	255223	2.0025e-06
23	35.4836	135.331	3.05	14.5	8.20142	-	1.84831	1.08063	1.5308	1.64322	5.95164	6.35732	2.50652	1.52238	0.787708	-	1.73018e-07	0	0	1.73018e-07	0	0	1.73018e-07	1250	2.82383e-06	0	8.77512e-09	6.75047e-08	4.33767e-09	2.70041e-08	8.61634e-08	11285	2.0156e-06	9.92244e-07	4.64294e-06	4.74569e-06	9.00757e-08	1.19659e-07	2.0654e-07	31375	1.65291e-06	1.98619e-06	3.75123e-06	3.90019e-06	3.39985e-08	7.87874e-08	2.48272e-07	282618	1.66609e-06
24	35.4831	135.335	3.071	15	3.70765	3.29711	1.39846	0.180415	4.82221	-	14.924	3.23354	1.97901	1.84018	2.31294	1.24759	7.46505e-06	3.3495e-06	7.17985e-06	7.24837e-06	4.28723e-09	2.81269e-07	3.2462e-07	1250	1.78738e-06	6.99895e-07	1.60779e-06	1.80432e-06	1.97717e-08	1.02822e-07	2.98626e-07	11285	1.15736e-06	4.06e-07	9.43289e-07	1.23033e-06	5.14786e-08	1.27354e-07	4.1431e-07	31375	1.28517e-06	2.70295e-07	1.11028e-06	1.30214e-06	4.83594e-07	5.88888e-07	8.9446e-07	282618	2.20957e-06
25	35.4834	135.34	3.238	13	19.0771	9.2556	1.9356	1.19781	1.56091	1.5197	6.82524	4.57524	4.65245	0.598406	2.00417	0.421124	5.88889e-06	0	6.27621e-07	9.08321e-07	4.88618e-06	5.11078e-06	5.88889e-06	1250	3.2698e-06	0	3.41269e-07	1.00923e-06	2.27562e-06	2.81069e-06	3.32133e-06	11285	2.84718e-06	0	3.92198e-07	8.94952e-07	1.34243e-06	1.64891e-06	2.25954e-06	31375	2.78288e-06	5.42548e-08	6.63123e-07	1.22496e-06	1.08537e-06	1.25389e-06	1.59029e-06	262714	2.56568e-06
26	35.4877	135.341	3.738	6	14.0971	2.4818	5.20331	2.46111	2.85162	1.45919	11.8126	5.31542	3.41571	2.56074	4.65448	2.00613	2.33429e-08	0	4.87056e-09	2.33429e-08	1.091e-08	2.33429e-08	2.33429e-08	1250	1.77579e-06	1.77059e-07	1.73372e-06	1.77191e-06	1.16062e-08	3.80434e-08	1.80339e-06	11285	1.34633e-06	4.34878e-07	2.68078e-06	2.74844e-06	7.85155e-08	1.24582e-07	2.08519e-06	31375	1.95369e-06	2.86357e-07	2.02555e-06	2.46381e-06	5.38036e-07	6.14292e-07	1.67054e-06	276465	1.84952e-06
27	35.4876	135.337	3.624	16	17.1382	12.0606	6.05381	2.2245	1.89286	1.0517	81.4653	25.6277	38.6551	7.69125	15.3543	1.02617	5.23412e-07	0	1.40566e-07	1.94994e-07	7.42809e-08	3.16943e-07	3.82845e-07	1250	4.41028e-07	7.96701e-09	5.95696e-07	7.1772e-07	5.35586e-08	1.25837e-07	2.50814e-07	11285	6.73246e-07	1.23293e-07	6.09238e-07	1.10539e-06	5.62987e-08	1.49194e-07	6.45402e-07	31375	8.97327e-07	8.13225e-07	1.91348e-06	2.16554e-06	1.45334e-07	2.61362e-07	5.14667e-07	282618	1.13527e-06
28	35.4876	135.333	3.531	15.7	8.09173	2.98633	4.00997	1.99643	2.73415	-	8.43084	-	0	-	1.52648	-	1.58271e-06	6.48644e-08	2.17819e-07	5.63442e-07	7.00045e-07	1.01927e-06	1.36489e-06	1250	1.22164e-06	2.01072e-08	1.0645e-07	3.77931e-07	4.90615e-07	6.27792e-07	8.85636e-07	11285	8.17863e-07	1.0695e-08	6.24499e-08	2.78408e-07	3.02591e-07	3.96322e-07	6.03385e-07	31375	2.09529e-06	6.93115e-07	1.46683e-06	1.69937e-06	2.32131e-07	3.08311e-07	5.28431e-07	282618	1.7333e-06
29	35.4881	135.33	3.541	14.2	4.32248	3.42799	4.05894	1.77843	2.93298	1.43396	7.22407	-	3.6074	2.47627	3.94733	0.689475	1.03345e-06	0	0	4.77779e-08	9.6838e-07	1.03345e-06	1.03345e-06	1250	2.60227e-08	9.94626e-08	2.15399e-06	2.54457e-06	2.03012e-07	3.24482e-07	9.32204e-07	11285	3.56306e-07	1.1598e-07	1.53104e-06	1.95208e-06	1.16601e-07	2.62729e-07	7.54342e-07	31375	1.76164e-06	2.72133e-07	1.40582e-06	1.74429e-06	5.49009e-07	6.57947e-07	9.95348e-07	282618	1.88134e-06
30	35.4874	135.325	3.443	5.7	10.3167	2.03609	2.95783	1.06534	6.04436	5.51498	11.4256	1.14467	1.35238	0.075553	2.34596	-	6.68084e-09	0	6.68084e-09	6.68084e-09	6.68084e-09	6.68084e-09	6.68084e-09	1250	2.3393e-05	0	4.43778e-08	5.14161e-08	4.05258e-08	5.14161e-08	5.14161e-08	11285	1.43036e-05	0	2.87957e-08	3.33636e-08	2.62968e-08	3.33636e-08	3.33636e-08	31375	5.76278e-06	0	1.79446e-07	2.71892e-07	2.74931e-08	7.52074e-08	1.32006e-07	223600	5.3952e-06
31	35.492	135.331	4.007	15	8.84292	4.56603	2.24355	2.65871	1.95254	0.736159	0	-	2.13303	-	0	-	7.69772e-08	0	0	4.26662e-08	1.14341e-08	3.43099e-08	3.88482e-08	1250	3.45558e-06	0	0	1.39944e-08	7.19509e-09	1.78901e-08	1.93792e-08	11285	9.84876e-06	0	0	3.16685e-08	5.90037e-08	1.51698e-07	1.73901e-07	31375	5.21842e-06	1.95881e-07	2.42311e-07	4.75074e-07	2.57882e-07	3.36106e-07	5.65054e-07	217464	3.36335e-06
32	35.492	135.336	4.069	19	8.21163	1.20786	6.00778	5.11368	2.10772	0.336869	6.94381	-	1.66494	1.16121	1.98588	0.989525	1.89358e-06	0	0	5.08919e-08	1.67844e-06	1.84269e-06	1.86968e-06	1250	1.77241e-07	1.24678e-07	2.26839e-07	2.59633e-07	1.16717e-06	1.32612e-06	1.36254e-06	11285	1.07791e-06	7.1873e-08	1.30766e-07	2.01753e-07	1.20898e-06	1.42225e-06	1.45997e-06	31375	3.86869e-06	3.25903e-07	5.17049e-07	6.02231e-07	6.14103e-07	1.0285e-06	1.24466e-06	282273	3.1476e-06
33	35.4916	135.339	4.114	16	18.2273	6.54904	4.53375	2.88516	4.72563	3.46799	11.4154	-	1.34469	1.44943	3.05725	1.41135	7.1336e-07	0	0	1.12861e-08	4.22919e-07	6.99611e-07	7.1336e-07	1250	1.82493e-07	0	0	3.91936e-08	4.51062e-07	6.6775e-07	7.13997e-07	11285	6.97905e-07	2.26192e-08	3.77934e-08	9.27851e-08	5.41421e-07	7.21266e-07	8.03823e-07	31375	1.66638e-06	4.37138e-07	1.88166e-06	1.97732e-06	5.37676e-07	8.97168e-07	1.08291e-06	274051	1.48889e-06
34	35.4919	135.344	4.271	13.5	6.79028	2.37386	7.09336	3.70484	5.73661	3.93414	6.08665	-	3.18558	1.35839	1.36777	0.483681	1.3502e-06	4.45346e-08	9.83543e-07	1.08728e-06	2.62304e-07	2.869e-07	9.44792e-07	1250	3.23871e-07	1.19642e-07	8.20662e-07	8.99324e-07	4.16303e-07	4.74047e-07	7.22511e-07	11285	3.82484e-07	7.00628e-08	1.13795e-06	1.29735e-06	4.14651e-07	4.86818e-07	7.68757e-07	31375	1.55912e-06	3.17657e-07	2.42614e-06	3.2094e-06	4.43009e-07	6.70699e-07	1.65881e-06	267832	1.01932e-06
35	35.4917	135.348	4.397	11	5.44344	4.98773	1.97335	0.888773	2.45795	1.77688	6.47866	-	0.484662	-	0	-	2.19956e-06	0	2.11684e-06	2.19956e-06	7.52184e-10	8.27183e-08	2.19956e-06	1250	1.19334e-07	0	1.96892e-06	2.04071e-06	2.5992e-08	7.77414e-08	2.04666e-06	11285	9.24243e-08	0	1.42308e-06	1.97612e-06	7.39826e-07	8.41703e-07	2.26478e-06	31375	8.8174e-07	1.88178e-08	1.62033e-06	2.87015e-06	4.7185e-07	8.01365e-07	2.9127e-06	219516	2.50101e-06
36	35.496	135.337	4.545	20	13.3693	8.93669	0.831579	-	1.38115	1.66641	4.56581	3.4544	2.47021	1.14646	0	-	2.2373e-06	0	1.86986e-06	2.06628e-06	7.46471e-08	1.53937e-07	1.71022e-07	1250	9.9786e-07	0	6.8695e-07	7.57976e-07	7.08489e-08	1.41851e-07	1.48703e-07	11285	1.25955e-06	0	3.75623e-07	4.2948e-07	6.18907e-08	1.76799e-07	1.86224e-07	31375	8.11443e-07	3.73153e-08	7.76179e-07	9.26918e-07	1.84729e-07	4.87183e-07	5.66671e-07	226911	8.11778e-07
37	35.4958	135.333	4.461	7	4.40922	1.6092	3.92704	3.79615	5.7447	-	6.61688	0.289223	1.48002	0.93585	1.21335	0.099889	7.09662e-07	0	1.8169e-07	1.8169e-07	4.21745e-07	5.27971e-07	5.27971e-07	1250	4.66116e-07	8.24859e-08	7.23914e-07	7.40042e-07	3.83438e-07	4.31107e-07	4.55614e-07	11285	3.43459e-07	4.76749e-08	5.01219e-07	7.72511e-07	6.46512e-07	6.91039e-07	7.15455e-07	31375	5.23117e-07	4.45795e-08	7.99341e-07	9.47328e-07	3.54853e-07	6.04286e-07	6.95208e-07	216434	7.01911e-07
38	35.5003	135.336	5.012	19	5.13035	1.89064	2.30755	1.76012	0.870429	0.943382	0	-	0.285597	-	0	-	7.57256e-07	0	0	0	9.98453e-08	7.57256e-07	7.57256e-07	1250	1.11207e-07	0	0	3.60522e-09	2.12374e-07	4.57575e-07	4.63927e-07	11285	1.6967e-07	0	1.46146e-07	1.71283e-07	3.62742e-07	5.54245e-07	5.90491e-07	31375	9.99164e-07	1.95206e-08	3.39845e-07	4.48081e-07	5.97434e-07	7.2745e-07	8.24485e-07	273943	6.94089e-07
39	35.5003	135.34	5.076	21.5	4.67369	3.37379	1.55985	-	1.48433	1.13634	0	-	0	-	0.0106562	-	7.0284e-07	0	0	0	6.95561e-07	7.0284e-07	7.0284e-07	1250	6.24307e-07	1.03317e-07	1.80444e-07	3.25602e-07	1.84696e-07	4.60065e-07	4.78862e-07	11285	4.91707e-07	4.93448e-08	8.70198e-08	2.5863e-07	2.25922e-07	3.75701e-07	3.92922e-07	31375	6.95722e-07	3.3879e-08	1.30534e-07	2.0135e-07	1.5863e-07	2.17277e-07	2.3817e-07	265498	7.9945e-07
40	35.5001	135.344	5.159	20	9.00144	1.94048	3.53848	1.16131	1.48625	1.51324	0	-	4.28822	2.16378	1.19698	1.29746	4.26414e-07	0	1.15401e-07	1.15401e-07	2.67682e-07	3.11012e-07	3.11012e-07	1250	7.40247e-07	0	5.29884e-08	1.35021e-07	1.40504e-07	1.9589e-07	2.34741e-07	11285	5.04057e-07	0	2.8231e-08	9.84254e-08	1.29085e-07	1.92721e-07	2.26872e-07	31375	6.10293e-07	0	2.34427e-08	9.06886e-08	2.20481e-07	2.99991e-07	3.36569e-07	278409	1.23358e-06
41	35.4993	135.348	5.202	21	5.32507	0.878223	3.39009	2.32123	3.08167	2.41259	8.69686	5.70638	0.456753	-	0	-	7.4423e-07	0	0	2.8197e-08	3.02957e-07	5.82112e-07	7.16033e-07	1250	1.50703e-06	0	0	2.59723e-08	3.05534e-07	4.38029e-07	5.13449e-07	11285	2.42266e-06	0	0	1.79362e-08	4.51443e-07	5.84707e-07	6.37043e-07	31375	1.47455e-06	9.25778e-08	4.21125e-07	4.86307e-07	4.27323e-07	6.90365e-07	7.41734e-07	270790	1.10728e-06
42	35.5029	135.348	5.57	19	5.69524	-	3.48186	2.52884	6.36501	2.48419	6.19455	-	0.837927	-	1.26696	1.27094	4.21668e-06	5.19983e-08	3.86483e-07	3.86483e-07	8.71646e-07	3.80335e-06	3.8302e-06	1250	1.67115e-07	1.51259e-08	1.57039e-07	1.81606e-07	6.05706e-07	1.53589e-06	1.58424e-06	11285	5.265e-07	6.49883e-09	4.36418e-07	5.68534e-07	4.68349e-07	8.84425e-07	9.3946e-07	31375	7.71383e-07	2.77782e-08	2.14515e-07	2.83799e-07	4.44582e-07	6.52542e-07	7.80438e-07	246935	1.16457e-06
43	35.5029	135.344	5.466	29.5	6.94887	1.4364	0	-	2.50471	1.88699	20.136	-	0.255625	-	2.10184	0.110748	3.49203e-06	0	0	9.68357e-07	1.08347e-07	4.19065e-07	1.9655e-06	1250	8.0803e-07	0	0	2.51944e-07	1.17405e-07	4.37036e-07	1.07004e-06	11285	1.62665e-06	3.05413e-07	3.2372e-07	4.55245e-07	2.58735e-07	5.46293e-07	9.34378e-07	31375	1.37409e-06	2.02663e-07	2.39138e-07	3.03215e-07	3.6748e-07	6.3804e-07	1.10776e-06	251569	1.40326e-06
44	35.5031	135.339	5.388	24.5	4.82391	1.58894	1.29339	0.454024	1.40394	-	10.9163	-	0	-	0.142102	-	6.29529e-07	0	7.0725e-08	9.4398e-08	1.79301e-07	5.35131e-07	5.35131e-07	1250	4.26377e-06	0	6.43534e-08	9.89363e-08	3.56877e-07	5.28081e-07	5.73134e-07	11285	2.54112e-06	1.35119e-08	8.47567e-08	1.01537e-07	4.77069e-07	6.8254e-07	7.72072e-07	31375	2.13703e-06	1.48648e-07	5.93417e-07	8.40959e-07	8.65922e-07	1.1141e-06	1.33151e-06	282618	1.68246e-06
45	35.5027	135.336	5.283	18.5	2.7025	1.49144	1.38728	1.35175	1.54232	0.236444	7.42846	2.54663	1.09971	0.726514	2.19808	1.37692	3.47163e-07	0	0	0	3.37079e-07	3.47163e-07	3.47163e-07	1250	1.02668e-06	0	9.93334e-07	1.38301e-06	1.03453e-06	1.40804e-06	1.64723e-06	11285	1.01375e-06	0	6.00938e-07	8.42927e-07	1.49422e-06	1.73963e-06	1.90559e-06	31375	1.91152e-06	1.31778e-07	1.96656e-06	2.44117e-06	1.27837e-06	1.45811e-06	1.56491e-06	252651	1.36598e-06
46	35.5085	135.336	5.944	20.5	3.37856	-	3.72648	-	2.47055	1.2547	10.2594	-	0	-	0	-	2.30178e-06	0	1.17052e-07	2.13707e-07	6.49685e-07	1.2855e-06	2.08887e-06	1250	9.7092e-08	4.81409e-08	4.85686e-07	6.87487e-07	4.32985e-07	8.22825e-07	1.13249e-06	11285	2.00146e-07	4.6541e-07	8.64744e-07	9.87921e-07	1.7566e-06	2.16568e-06	2.39018e-06	31375	1.37991e-06	1.64521e-07	5.71965e-07	6.66009e-07	1.03263e-06	1.36036e-06	1.51271e-06	275545	8.93387e-07
47	35.5086	135.341	6.027	26	2.88564	2.63571	3.02232	1.00251	1.71311	-	0	-	0	-	0	-	2.16948e-07	0	0	5.79423e-08	1.09907e-07	1.3501e-07	1.35145e-07	1250	9.26875e-08	0	9.33092e-08	1.92385e-07	1.69297e-07	2.12018e-07	2.4338e-07	11285	7.29695e-08	0	6.94696e-08	1.58149e-07	4.0966e-07	9.55311e-07	1.02541e-06	31375	4.97409e-07	5.77998e-08	2.018e-07	2.80101e-07	4.4324e-07	7.97758e-07	9.1006e-07	263038	8.66382e-07
The number of eDNA concentrations were averaged over three PCR replicates. Samples from the surface and bottom of St. 2 and those from the bottom of St. 27 showed extremely high eDNA concentration, and these data were excluded as outliers.
1, "-" means that only one of triplicate or no triplicate was amplified.
[truncated: 7 more columns]
